# Supplementary material
Source: publisher figshare collection journal article supplement (https://tandf.figshare.com/ndownloader/files/14132432)
Supplement: Supplementary file 1 [file 14132432]

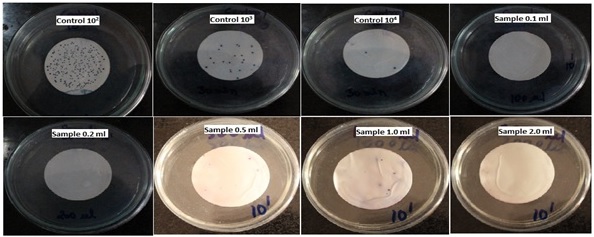


**Figure S1:.**Effect of coagulant on *E.coli* removal


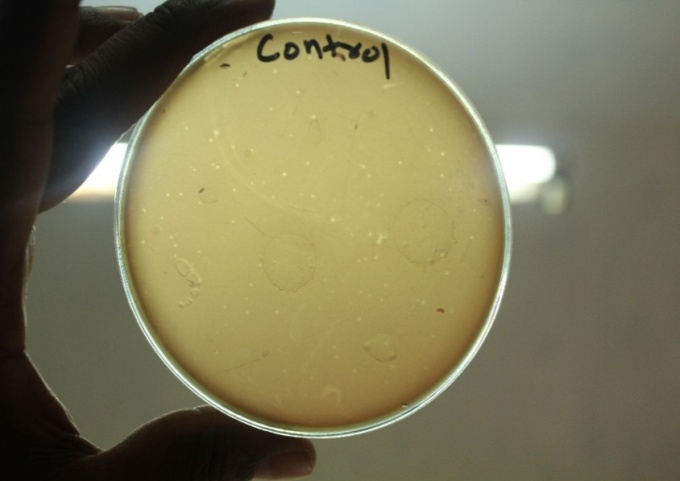


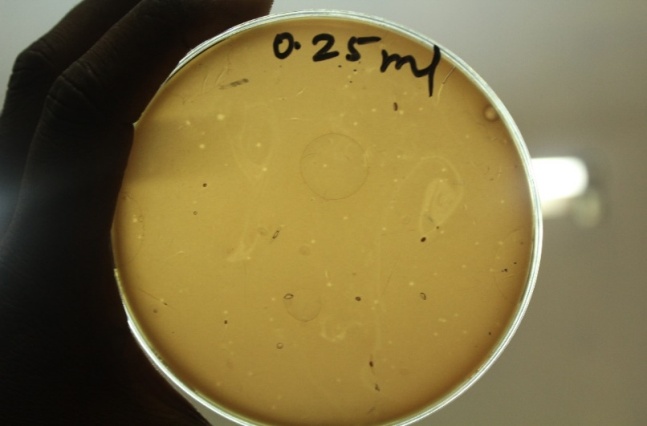

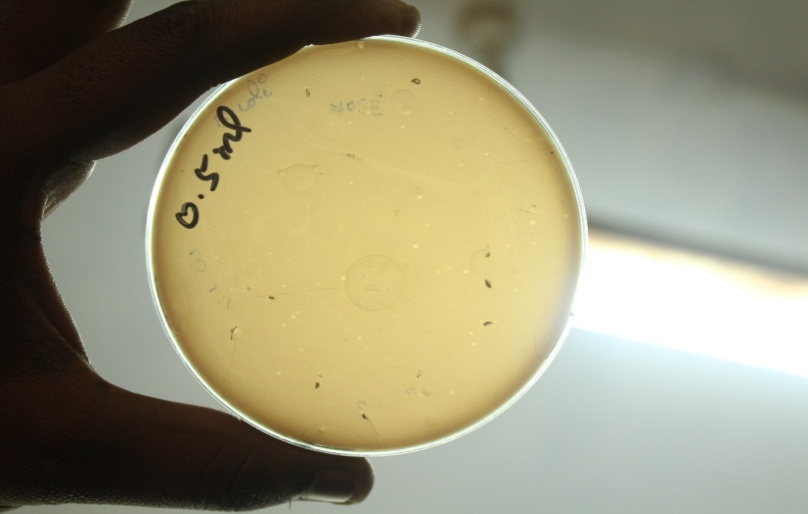


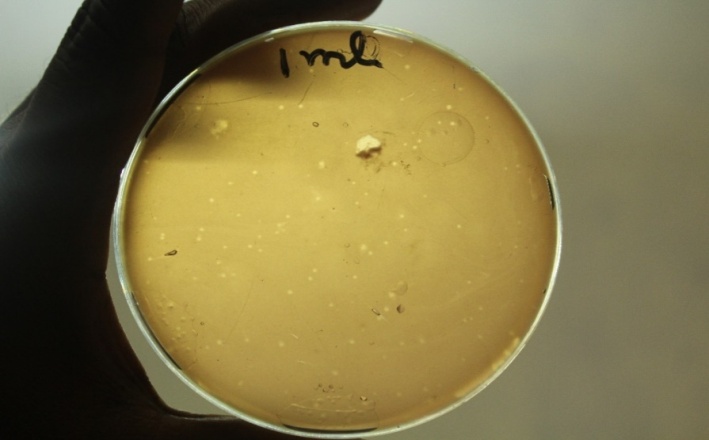

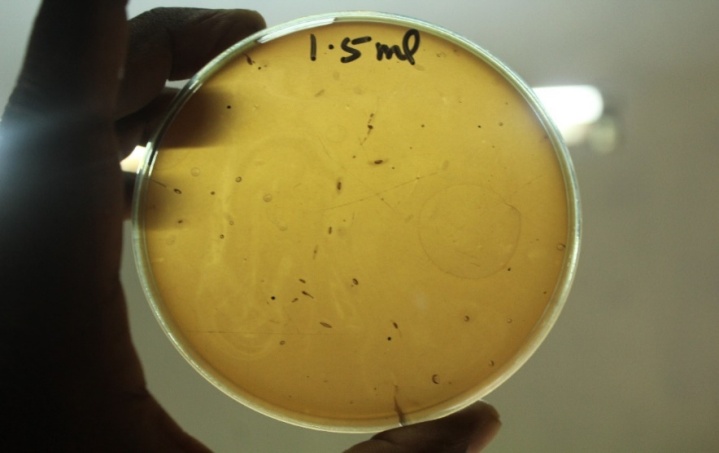


**Figure S2:**Effect of coagulant on coliphage removal

**
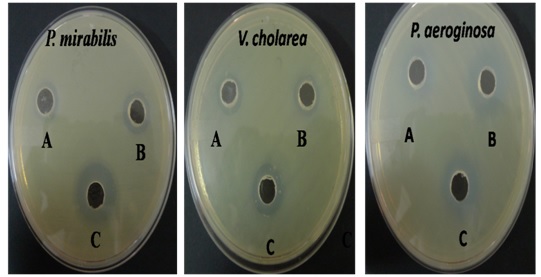
**

**A-0.1% Aqueous Extract ; B-1%Aqueous Extract;**

**C-Positive Control Amphicloxacillin**

**Figure S3 :** Antibacterial activity of the aqueous extract of *Strychnos potatorum*

**
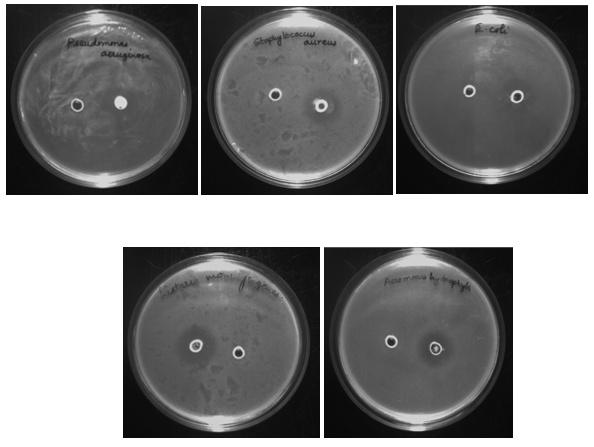
**

**Figure S4:**Antibacterial activity of Methyl Palmitoleate
